# Supplementary material
Source: PubMed Central journal article supplement (PMC3557052)
Supplement: 1221538110_pnas.201221538SI.pdf [file 1221538110_pnas.201221538SI.pdf]

# Supporting Information

Wu et al. 10.1073/pnas.1221538110

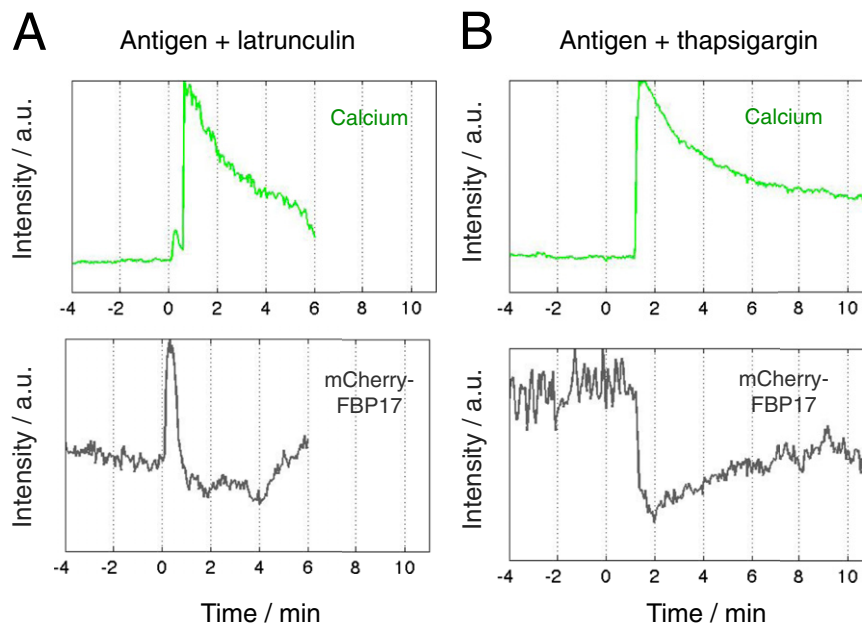

**Fig. S1.** Standing oscillations of FBP17 require a normal calcium homeostasis and actin dynamics. (A) Addition of 12.5  $\mu$ M latrunculin B together with antigen induced one transient pulse of FBP17 recruitment to the membrane without oscillations. (B) Addition of 2  $\mu$ M thapsigargin together with antigen stimulation abolished both calcium oscillations and FBP17 oscillations. For both A and B, time 0 is the time of antigen addition.

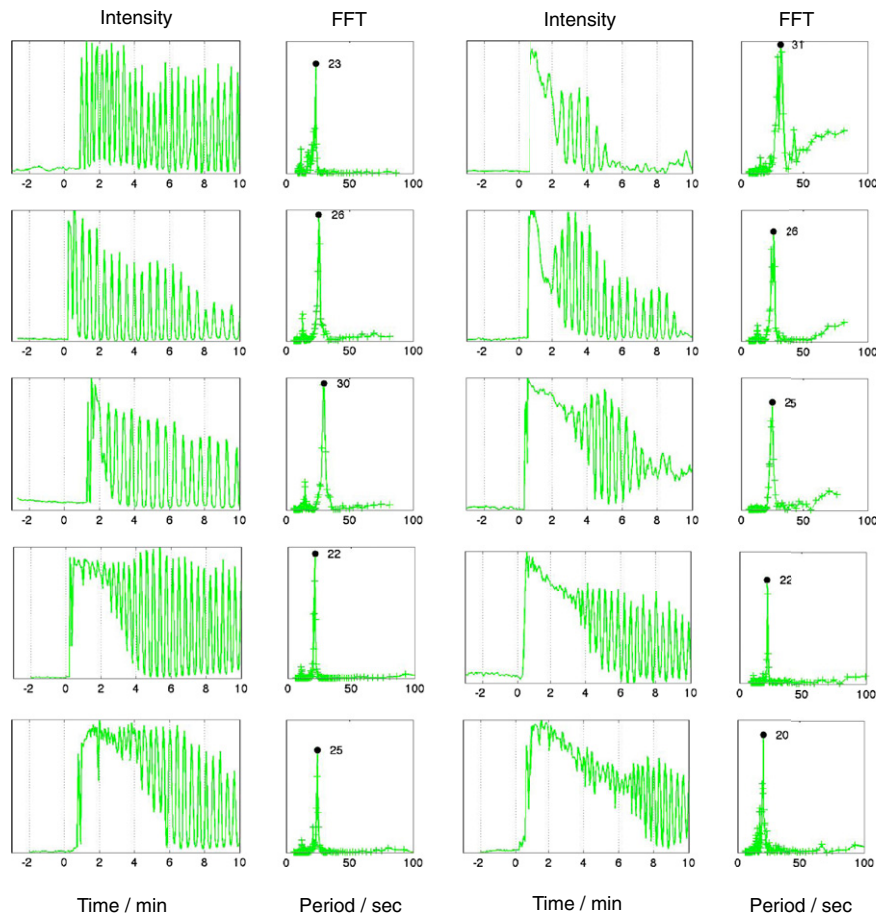

**Fig. S2.** Additional examples of antigen stimulation-induced cytosolic calcium oscillations. Note that the time of onset of calcium oscillations relative to the stimulus, and the duration of calcium oscillations, are heterogeneous. Time 0 is the time of antigen addition.



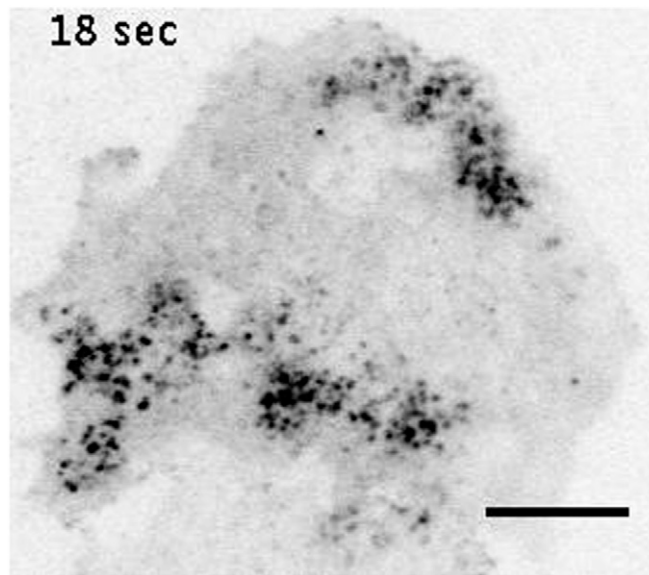

**Movie S1.** Total internal reflection fluorescence microscopy (TIRFM) movie of mast cell showing dramatic recurring traveling waves of mCherry-FBP17. The movie was acquired at 3-s intervals starting 100 min after antigen stimulation and is played at 20 frames per second (60× real time). (Scale bar: 10  $\mu\text{m}$ .)

[Movie S1](#)

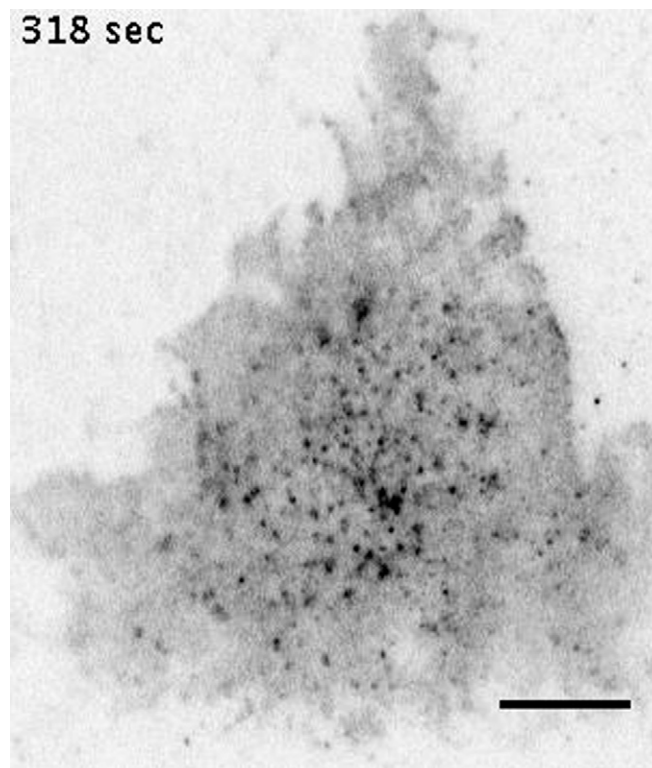

**Movie S2.** TIRFM movie of mast cell showing oscillatory recruitment of mCherry-FBP17. The movie was acquired at 3-s intervals starting 40 min after antigen stimulation and is played at 20 frames per second (60× real time). (Scale bar: 10  $\mu\text{m}$ .)

[Movie S2](#)

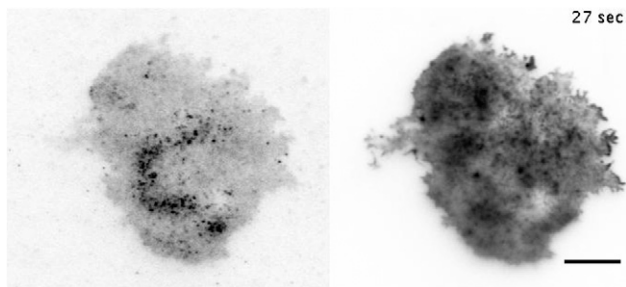

**Movie S3.** Recurring traveling waves of mCherry-FBP17 (*Left*) and LifeAct-EGFP (*Right*) induced by antigen stimulation were abolished by the addition of latrunculin B at frame 223. The movie was acquired at 3-s intervals and is played at 30 frames per second (90× real time). (Scale bar: 10  $\mu$ m.)

[Movie S3](#)

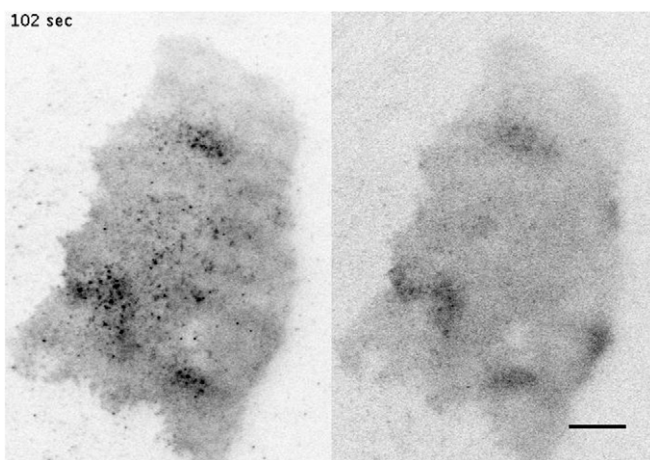

**Movie S4.** Two-color TIRFM movie of mast cell showing traveling waves of coexpressed mCherry-FBP17 (*Left*) and Cdc42 activity probe CBD-EGFP (*Right*). Note that waves precisely overlap both spatially and temporally. The movie was acquired at 2-s intervals starting 100 min after antigen stimulation and is played at 20 frames per second (40× real time). (Scale bar: 10  $\mu$ m.)

[Movie S4](#)

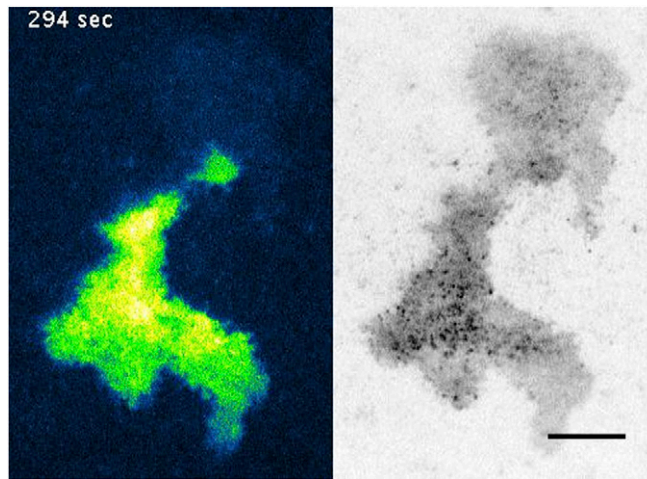

**Movie S5.** Two-color TIRFM movie of mast cell expressing the calcium sensor GCAMP3 (*Left*) and mCherry-FBP17 (*Right*). Antigen stimulation elicited dramatic calcium and FBP17 oscillations. Antigen was added at frame 121. The sample was imaged for 400 frames at 3-s intervals, and the movie is played at 40 frames per second (120 $\times$  real time). An inverted grayscale lookup table was used in the case of FBP17, and fluorescence is shown in black. (Scale bar: 10  $\mu$ m.)

[Movie S5](#)

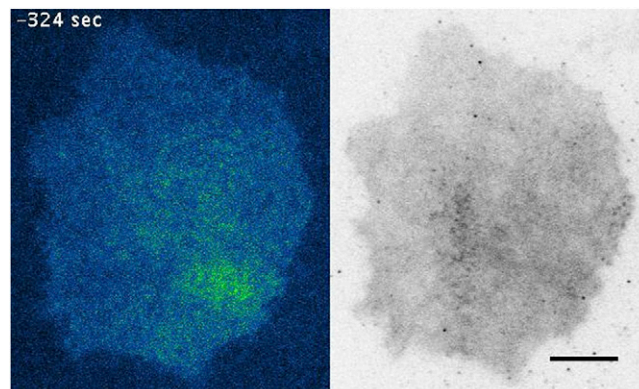

**Movie S6.** Two-color TIRFM movie of mast cell expressing the calcium sensor GCAMP3 (*Left*) and mCherry-FBP17 (*Right*). Stimulation induced a conversion of mCherry-FBP17 fluorescence fluctuations from spontaneously occurring waves to standing oscillations that have the same frequency as robust calcium oscillations. Antigen was added at frame 108. The sample was imaged at 3-s intervals for 300 frames, and the movie is played at 20 frames per second (60 $\times$  real time). (Scale bar: 10  $\mu$ m.)

[Movie S6](#)



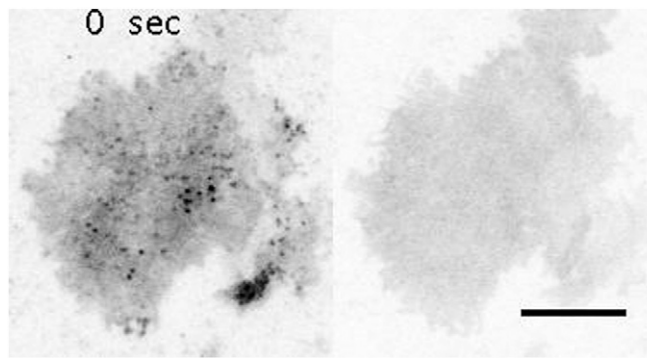

**Movie S7.** Two-color TIRFM movie of mast cell expressing the calcium sensor GCAMP3 (*Right*) and mCherry-FBP17 (*Left*). Note spontaneous conversion of mCherry-FBP17 fluctuations from oscillations to waves during the poststimulation period. The transition from oscillations to waves correlates with the interruption of calcium oscillations. The movie was acquired at 3-s intervals 35 min after stimulation and is played at 20 frames per second (60× real time). (Scale bar: 10  $\mu$ m.)

[Movie S7](#)
